# Supplementary material for: Study on the Microflora Structure in a Litopenaeus vannamei–Sinonovacula constricta Tandem-Culture Model Based on High-Throughput Sequencing under Different Culture Densities
Source: MDPI journal article supplement (doi:10.3390/fishes8060287), 2023-05-26
Supplement: s1 [file s1]

Supplementary material for the paper

**Study on the microflora structure in *Litopenaeus vannamei*-*Sinonovacula constricta* tandem culture model based on high-throughput sequencing under different culture densities**

Chunpu Zhao<sup>1</sup>, Jilin Xu<sup>1,2</sup>, Shanliang Xu<sup>1,2,\*</sup>, Gege Bao<sup>1</sup> and Danli Wang<sup>1,2,\*</sup>

**Table S1.** Relative abundance of main bacterial groups in water

| Genus                 | CS           | MXS1         | MXS2        | MXS3        | MXS4         | MYS1        | MYS2         | MYS3        | MYS4         |
|-----------------------|--------------|--------------|-------------|-------------|--------------|-------------|--------------|-------------|--------------|
| uncultured_bacterium_ |              |              |             |             |              |             |              |             |              |
| f_Rhodobacteraceae    | 50.86±21.96a | 21.61±1.97b  | 26.46±3.73b | 20.10±0.24b | 35.19±3.71ab | 17.70±2.23b | 26.98±2.59b  | 27.61±1.72b | 19.71±14.08b |
| uncultured_bacterium_ |              |              |             |             |              |             |              |             |              |
| f_Cryomorphaceae      | 1.93±1.32c   | 14.20±4.59b  | 2.99±0.72c  | 2.86±0.31c  | 3.73±0.33c   | 29.23±5.61a | 4.28±0.43c   | 4.22±0.68c  | 4.96±1.01c   |
| NS3a_marine_group     | 1.40±0.76d   | 11.59±1.16ab | 9.87±1.97b  | 5.02±0.11c  | 2.53±0.10cd  | 9.28±0.41b  | 14.25±2.36a  | 4.57±0.51c  | 2.00±0.24d   |
| uncultured_bacterium_ |              |              |             |             |              |             |              |             |              |
| f_NS9_marine_group    | 0.47±0.34d   | 0.73±0.03d   | 4.57±0.88c  | 9.89±0.50a  | 4.21±0.80c   | 0.32±0.02d  | 4.58±0.53c   | 8.19±0.90b  | 3.51±0.68c   |
| uncultured_bacterium_ |              |              |             |             |              |             |              |             |              |
| f_Saprospiraceae      | 0.22±0.14e   | 0.55±0.09e   | 3.11±1.31d  | 9.03±1.10a  | 4.80±0.38c   | 0.47±0.16e  | 4.65±0.33c   | 6.76±0.60b  | 3.17±0.84d   |
| Nautella              | 0.20±0.10d   | 2.61±0.33c   | 8.10±1.23a  | 3.23±0.12c  | 0.77±0.04d   | 2.61±0.22c  | 7.66±0.87a   | 4.45±0.21b  | 0.42±0.21d   |
| Aureimarina           | 0.93±0.53c   | 4.35±0.32a   | 2.67±0.79cd | 3.69±0.19ab | 2.00±0.06d   | 3.71±0.36ab | 3.47±0.43abc | 3.31±0.29bc | 2.86±0.41bcd |
| uncultured_bacterium_ |              |              |             |             |              |             |              |             |              |
| f_Burkholderiaceae    | 0.17±0.09d   | 1.80±0.22c   | 6.78±0.53b  | 0.60±0.02d  | 1.49±0.15c   | 1.92±0.46c  | 7.64±0.08a   | 0.64±0.10d  | 1.44±0.61c   |
| uncultured_bacterium_ |              |              |             |             |              |             |              |             |              |
| f_Flavobacteriaceae   | 2.10±1.20cde | 4.64±0.40a   | 3.05±0.59cd | 1.51±0.05e  | 1.97±0.33cde | 3.53±0.19b  | 2.73±0.29bcd | 1.19±0.14e  | 1.76±0.39de  |
| Phaeodactylibacter    | 0.08±0.05c   | 0.01±0.00c   | 0.85±0.09c  | 5.76±0.52a  | 3.65±0.54b   | 0.06±0.01c  | 0.40±0.02c   | 4.80±0.48a  | 2.90±1.15b   |

Different letters in the same line represent significant differences between different groups ( $p < 0.05$ ).

**Table S2.** Relative abundance of main bacterial groups in sediment

| Genus                                       | CN         | MYN1        | MYN2         | MYN3         | MYN4        |
|---------------------------------------------|------------|-------------|--------------|--------------|-------------|
| uncultured_bacterium_f_Anaerolineaceae      | 3.51±2.15c | 7.63±0.11bc | 11.65±4.83ab | 11.06±0.19ab | 13.71±1.06a |
| Woeseia                                     | 3.80±2.91b | 9.72±0.92a  | 7.99±3.19ab  | 11.14±0.46a  | 10.53±0.59a |
| uncultured_bacterium_f_Desulfobulbaceae     | 1.28±0.84d | 3.82±0.28a  | 1.66±0.50cd  | 3.15±0.09ab  | 2.51±0.07bc |
| uncultured_bacterium_c_Gammaproteobacteriay | 1.68±0.47c | 2.67±0.19ab | 2.04±0.48bc  | 3.22±0.09a   | 2.61±0.28ab |
| uncultured_bacterium_f_Rhodobacteraceae     | 2.23±1.74a | 3.29±0.33a  | 1.87±0.67a   | 2.25±0.06a   | 2.46±0.14a  |
| uncultured_bacterium_o_Gammaproteobacteria  |            |             |              |              |             |
| Incertae_Sedis                              | 1.13±0.83b | 2.79±0.42a  | 2.28±0.73ab  | 3.13±0.10a   | 2.67±0.25a  |
| uncultured_bacterium_o_Actinomarinales      | 0.74±0.41b | 2.06±0.13ab | 3.00±1.39a   | 2.41±0.27ab  | 2.84±0.63a  |
| uncultured_bacterium_f_Lachnospiraceae      | 6.64±4.18a | 1.04±1.08ab | 2.83±3.49ab  | 0.13±0.04b   | 0.11±0.02b  |
| uncultured_bacterium_o_SBR1031              | 1.05±0.61b | 1.93±0.09ab | 1.93±0.70ab  | 2.32±0.41a   | 2.94±0.40a  |
| uncultured_bacterium_o_Chloroplast          | 4.21±2.42a | 1.37±0.43b  | 1.47±0.32b   | 1.82±0.15b   | 1.11±0.20b  |

Different letters in the same line represent significant differences between different groups ( $p < 0.05$ ).

**Table S3.** Relative abundance of main flora in the visceral mass of *S. constricta*

| Genus                                  | CY          | MY1         | MY2         | MY3          | MY4         |
|----------------------------------------|-------------|-------------|-------------|--------------|-------------|
| Lactococcus                            | 10.61±3.92a | 14.76±4.93a | 16.97±1.37a | 11.72±4.70a  | 16.72±1.90a |
| uncultured_bacterium_f_Lachnospiraceae | 15.09±2.96a | 5.71±1.61b  | 6.50±0.49b  | 10.43±6.02ab | 6.99±1.05b  |

|                                        |            |              |             |             |             |
|----------------------------------------|------------|--------------|-------------|-------------|-------------|
| uncultured_bacterium_c_Subgroup_6      | 3.24±0.44a | 3.28±0.73a   | 3.29±0.42a  | 4.87±1.94a  | 2.47±0.96a  |
| uncultured_bacterium_f_Spirochaetaceae | 0.26±0.16b | 1.89±0.97b   | 3.95±1.31b  | 0.97±0.32b  | 8.62±4.04a  |
| <i>Lactobacillus</i>                   | 2.52±0.67a | 3.02±0.93a   | 3.09±0.40a  | 2.75±0.67a  | 3.72±0.49a  |
| <i>Alloprevotella</i>                  | 4.45±0.93a | 1.78±0.49b   | 2.07±0.22b  | 3.06±1.51ab | 2.32±0.35b  |
| uncultured_bacterium_f_Muribaculaceae  | 3.09±0.74a | 1.98±0.21b   | 2.10±0.07b  | 3.35±0.56a  | 1.83±0.33b  |
| <i>Mycoplasma</i>                      | 0.00±0.00a | 10.06±13.30a | 0.06±0.04a  | 0.13±0.14a  | 0.03±0.02a  |
| <i>Dongia</i>                          | 1.27±0.30a | 2.24±0.58a   | 2.26±0.25a  | 1.89±0.80a  | 1.86±0.07a  |
| Lachnospiraceae_NK4A136_group          | 2.18±0.33a | 1.21±0.30b   | 1.60±0.06ab | 1.82±0.55ab | 1.58±0.04ab |

Different letters in the same line represent significant differences between different groups ( $p < 0.05$ ).

**Table S4.** Relative abundance of major intestinal flora of *L. vannamei*

| Genus                                    | CX          | MX1         | MX2         | MX3         | MX4         |
|------------------------------------------|-------------|-------------|-------------|-------------|-------------|
| <i>Lactococcus</i>                       | 6.69±0.66a  | 13.92±1.26a | 10.79±6.76a | 16.29±4.94a | 11.32±2.77a |
| uncultured_bacterium_f_Lachnospiraceae   | 9.41±0.53a  | 7.24±3.15a  | 7.40±2.76a  | 6.93±1.16a  | 7.41±3.33a  |
| uncultured_bacterium_c_Subgroup_6        | 3.44±0.19a  | 4.66±0.85a  | 3.30±2.19a  | 3.70±1.18a  | 4.94±1.70a  |
| <i>Alloprevotella</i>                    | 3.38±0.27a  | 2.37±0.93a  | 6.21±5.92a  | 4.07±3.06a  | 2.11±0.60a  |
| uncultured_bacterium_f_Muribaculaceae    | 3.21±0.27a  | 2.43±0.16a  | 5.43±4.54a  | 3.13±1.56a  | 2.94±0.93a  |
| uncultured_bacterium_f_Flavobacteriaceae | 15.81±1.25a | 0.07±0.06b  | 0.03±0.02b  | 0.04±0.04b  | 0.05±0.01b  |
| <i>Lactobacillus</i>                     | 1.78±0.21b  | 2.52±0.14ab | 2.94±1.08ab | 3.48±0.52a  | 2.51±0.31ab |
| <i>Photobacterium</i>                    | 0.86±0.33a  | 2.48±1.11a  | 0.18±0.15a  | 0.17±0.06a  | 6.99±8.90a  |
| Lachnospiraceae_NK4A136_group            | 1.65±0.16a  | 1.49±0.26a  | 2.58±2.02a  | 1.94±0.84a  | 1.43±0.18a  |
| uncultured_bacterium_o_Chloroplast       | 0.98±0.09a  | 1.87±0.23a  | 1.47±0.89a  | 1.61±0.53a  | 1.83±0.35a  |

Different letters in the same line represent significant differences between different groups ( $p < 0.05$ ).

**Table S5.** Alpha diversity index of each *L. vannamei* intestinal content sample at the OTU level

|     | Shannon index | Simpson index | ACE index       | Chao1 index      |
|-----|---------------|---------------|-----------------|------------------|
| CX  | 7.31±0.10a    | 0.966±0.003a  | 949.40±6.01b    | 983.93±21.52b    |
| MX1 | 7.79±0.09a    | 0.975±0.003a  | 1030.60±17.85ab | 1078.29±9.88ab   |
| MX2 | 7.31±0.46a    | 0.970±0.004a  | 957.77±20.21b   | 1069.43±111.07ab |
| MX3 | 7.60±0.15a    | 0.965±0.008a  | 1151.67±102.15a | 1205.12±79.33a   |
| MX4 | 7.59±0.31a    | 0.969±0.013a  | 1009.53±23.04ab | 1046.91±32.40ab  |

Different letters in the same line represent significant differences between different groups ( $p < 0.05$ ).

**Table S6.** Alpha diversity index of the visceral mass samples of each *S. constricta* at the OTU level

|     | Shannon index | Simpson index | ACE index       | Chao1 index      |
|-----|---------------|---------------|-----------------|------------------|
| CY  | 7.52±0.07a    | 0.977±0.003a  | 1135.98±85.18a  | 1173.43±97.56a   |
| MY1 | 7.13±0.31a    | 0.957±0.006b  | 941.29±22.11b   | 985.56±36.43bc   |
| MY2 | 7.62±0.08a    | 0.967±0.003ab | 1111.05±32.08a  | 1136.69±19.82ab  |
| MY3 | 7.60±0.17a    | 0.976±0.002a  | 892.84±11.63b   | 926.23±22.21c    |
| MY4 | 7.24±0.05a    | 0.961±0.003b  | 1031.83±47.10ab | 1070.64±35.12abc |

Different letters in the same line represent significant differences between different groups ( $p < 0.05$ ).

**Table S7.** Alpha diversity index of water samples at OTU level

|      | Shannon index | Simpson index | ACE index         | Chao1 index      |
|------|---------------|---------------|-------------------|------------------|
| CS   | 4.90±0.84b    | 0.825±0.068b  | 1246.60±62.68ab   | 1226.36±57.28ab  |
| MXS1 | 5.54±0.12ab   | 0.947±0.006a  | 1258.79±13.67ab   | 1123.76±67.85ab  |
| MXS2 | 5.45±0.13b    | 0.942±0.005a  | 1030.56±92.67bc   | 1036.15±65.01b   |
| MXS3 | 6.01±0.04ab   | 0.964±0.001a  | 1216.33±41.94abc  | 1016.47±24.79b   |
| MXS4 | 5.78±0.19ab   | 0.923±0.011a  | 1157.07±104.93abc | 1108.07±58.05ab  |
| MYS1 | 4.92±0.31b    | 0.893±0.024ab | 933.19±45.21c     | 964.51±46.54b    |
| MYS2 | 5.13±0.06b    | 0.933±0.003a  | 1052.30±69.94bc   | 971.52±29.17b    |
| MYS3 | 5.97±0.05ab   | 0.961±0.002a  | 1214.57±179.34abc | 1159.28±188.77ab |
| MYS4 | 6.85±0.77a    | 0.957±0.028a  | 1383.79±116.80a   | 1322.76±21.99a   |

Different letters in the same line represent significant differences between different groups ( $p < 0.05$ ).

**Table S8.** Alpha diversity index of sediment samples at OTU level

|      | Shannon index | Simpson index  | ACE index        | Chao1 index      |
|------|---------------|----------------|------------------|------------------|
| CN   | 8.554±0.110a  | 0.9895±0.0002c | 1475.09±9.23a    | 1483.92±21.03a   |
| MYN1 | 8.635±0.097a  | 0.9935±0.0005a | 1471.54±12.85a   | 1470.19±12.53a   |
| MYN2 | 8.492±0.158a  | 0.9898±0.0005c | 1353.14±104.85ab | 1328.85±118.15ab |
| MYN3 | 8.503±0.004a  | 0.9927±0.0001a | 1303.78±74.00ab  | 1272.99±47.33b   |
| MYN4 | 8.395±0.026a  | 0.9914±0.0004b | 1259.54±23.70b   | 1230.75±10.38b   |

Different letters in the same line represent significant differences between different groups ( $p < 0.05$ ).
